# Supplementary material
Source: PubMed Central journal article supplement (PMC7419582)
Supplement: mmc1.pdf [file mmc1.pdf]

## SUPPLEMENTARY MATERIALS

**Figure S1** Chromatograms of chloroquine and drug-loaded suspension without filtrations or centrifugation.

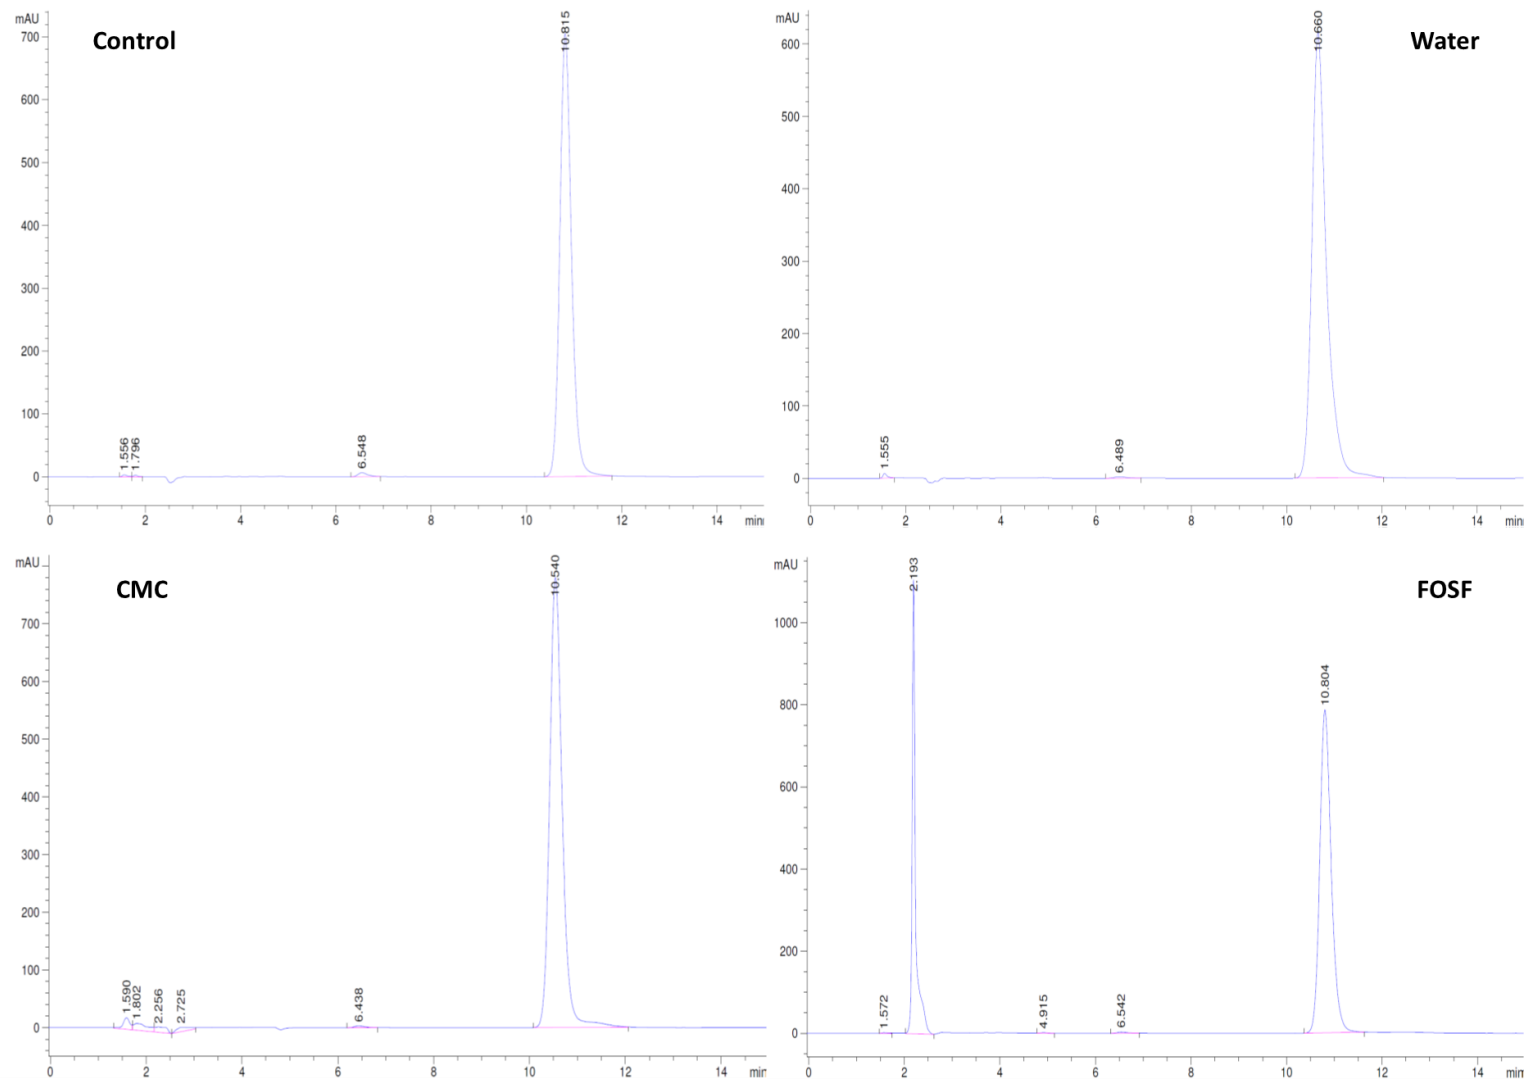

**Figure S2** Chromatograms of hydroxychloroquine and drug-loaded suspension without filtrations or centrifugation.

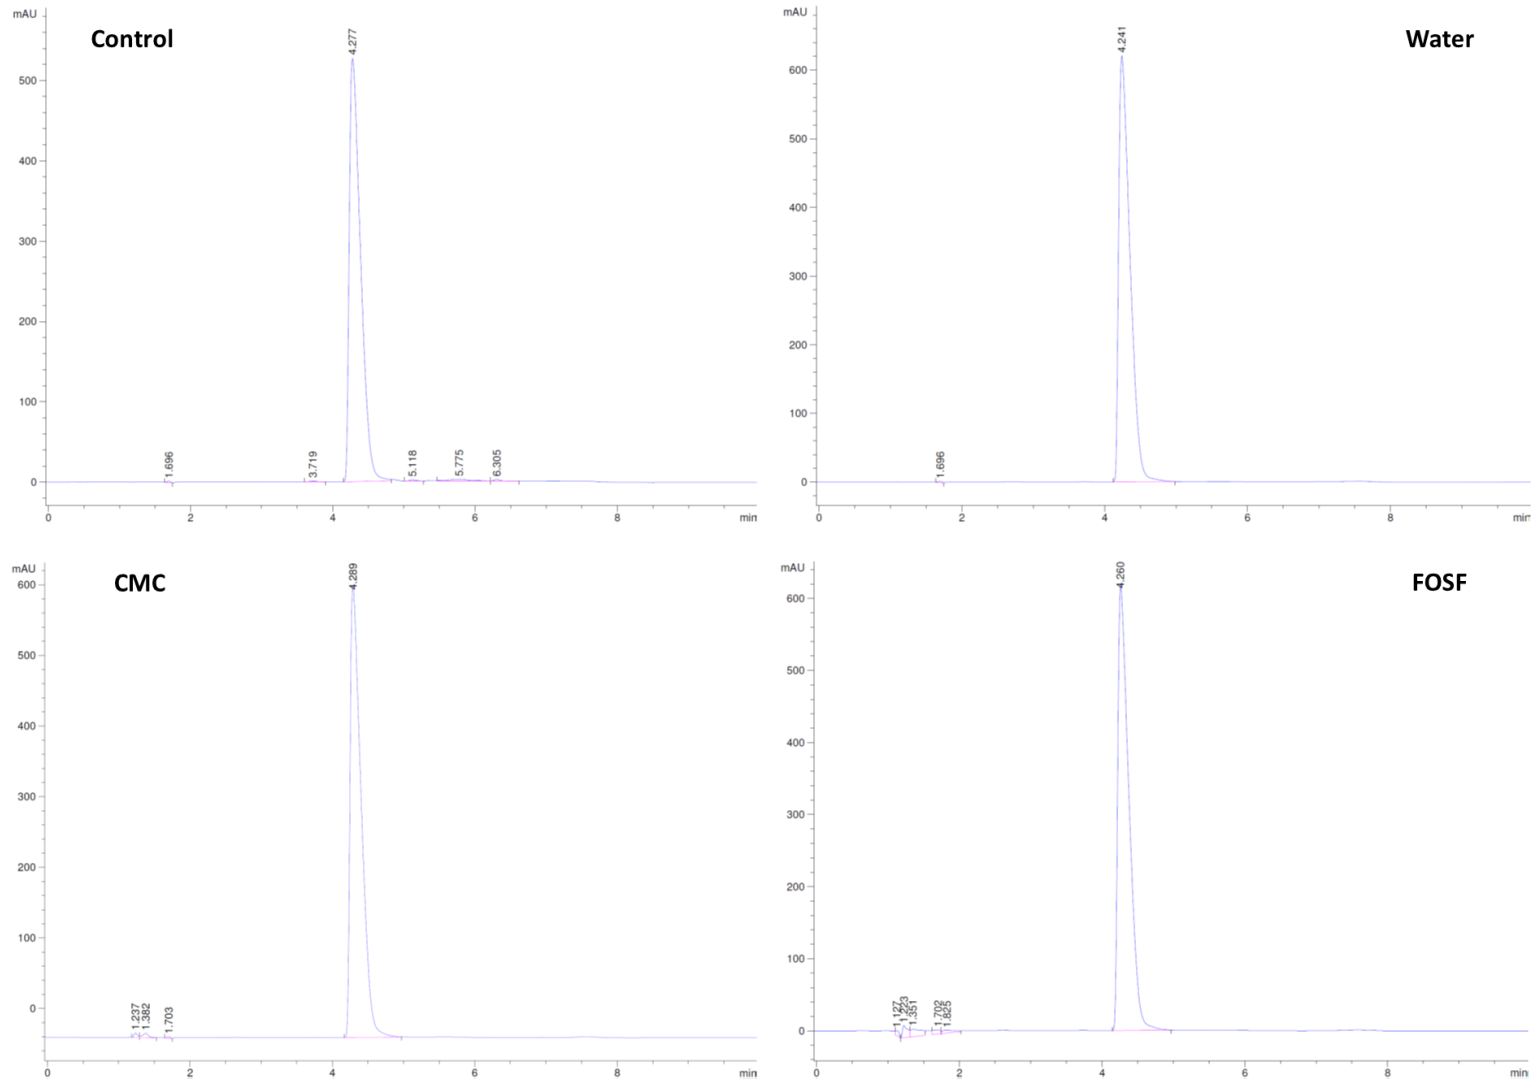

**Table S1** Raw data of analytical analyses of filtered/centrifuged suspension containing chloroquine

| Conc.         | Vehicle | Filter/centrifugation | Dil.    | RT     | Peak area | Conc. (mg/mL) | Assay (%) |
|---------------|---------|-----------------------|---------|--------|-----------|---------------|-----------|
| 4 mg/mL       | Control | -                     | 1:4     | 10.597 | 12698.3   | 4.192         | 102.3     |
|               |         | -                     | 1:4     | 10.603 | 12681.3   | 4.186         | 102.1     |
|               |         | -                     | 1:4     | 10.885 | 12068.2   | 3.982         | 99.1      |
|               |         | 0.2 µm, NYL           | 1:4     | 10.597 | 12662.9   | 4.180         | 102.0     |
|               |         | 0.2 µm, NYL           | 1:4     | 10.581 | 13591.5   | 4.488         | 109.5     |
|               |         | 0.2 µm, NYL           | 1:4     | 10.878 | 12320.6   | 4.066         | 101.1     |
|               |         | 0.2 µm, PES           | 1:4     | 10.568 | 12360.9   | 4.080         | 99.5      |
|               |         | 0.2 µm, PES           | 1:4     | 10.554 | 12758.3   | 4.212         | 102.7     |
|               |         | 0.2 µm, PES           | 1:4     | 10.836 | 12399.9   | 4.093         | 101.8     |
|               |         | 0.45 µm, PP           | 1:4     | 10.536 | 12522.3   | 4.133         | 100.8     |
|               |         | 0.45 µm, PP           | 1:4     | 10.531 | 12700.2   | 4.192         | 102.3     |
|               |         | 0.45 µm, PP           | 1:4     | 10.725 | 12235.0   | 4.038         | 100.4     |
|               |         | 0.45 µm, PTFE         | 1:4     | 10.538 | 12773.4   | 4.217         | 102.9     |
|               |         | 0.45 µm, PTFE         | 1:4     | 10.521 | 12862.6   | 4.246         | 103.6     |
|               |         | 0.45 µm, PTFE         | 1:4     | 10.660 | 11930.1   | 3.937         | 97.9      |
|               | Water   | -                     | 1:4     | 10.540 | 12379.0   | 4.086         | 102.8     |
|               |         | -                     | 1:4     | 10.580 | 12355.7   | 4.078         | 102.6     |
|               |         | -                     | 1:4     | 10.734 | 12171.1   | 4.017         | 98.5      |
|               |         | 0.2 µm, NYL           | 1:4     | 10.607 | 12239.2   | 4.039         | 101.6     |
|               |         | 0.2 µm, NYL           | 1:4     | 10.659 | 11968.9   | 3.949         | 99.4      |
|               |         | 0.2 µm, NYL           | 1:4     | 10.775 | 12198.1   | 4.0255        | 98.8      |
|               |         | 0.2 µm, PES           | 1:4     | 10.626 | 12385.0   | 4.088         | 102.8     |
|               |         | 0.2 µm, PES           | 1:4     | 10.630 | 11910.7   | 3.930         | 98.9      |
|               |         | 0.2 µm, PES           | 1:4     | 10.778 | 12301.3   | 4.060         | 99.6      |
|               |         | 0.45 µm, PP           | 1:4     | 10.695 | 12122.1   | 4.000         | 100.6     |
|               |         | 0.45 µm, PP           | 1:4     | 10.755 | 11973.3   | 3.951         | 99.4      |
|               |         | 0.45 µm, PP           | 1:4     | 10.773 | 12359.1   | 4.079         | 100.1     |
|               |         | 0.45 µm, PTFE         | 1:4     | 10.765 | 12139.6   | 4.006         | 100.8     |
|               |         | 0.45 µm, PTFE         | 1:4     | 10.760 | 12026.7   | 3.969         | 99.9      |
|               |         | 0.45 µm, PTFE         | 1:4     | 10.788 | 12265.3   | 4.048         | 99.3      |
|               | CMC     | -                     | 1:4     | 10.774 | 14187.9   | 4.686         | 116.4     |
|               |         | -                     | 1:4     | 10.766 | 12685.5   | 4.187         | 104.0     |
|               |         | -                     | 1:4     | 10.816 | 12750.9   | 4.209         | 103.5     |
|               |         | 0.2 µm, NYL           | 1:4     | 10.727 | 12484.8   | 4.121         | 102.4     |
|               |         | 0.2 µm, NYL           | 1:4     | 10.685 | 12385.5   | 4.088         | 101.5     |
|               |         | 0.2 µm, NYL           | 1:4     | 10.804 | 12743.2   | 4.207         | 103.4     |
|               |         | 0.2 µm, PES           | 1:4     | 10.719 | 12763.7   | 4.213         | 104.7     |
|               |         | 0.2 µm, PES           | 1:4     | 10.718 | 12909.6   | 4.262         | 105.9     |
|               |         | 0.2 µm, PES           | 1:4     | 10.802 | 12626.6   | 4.168         | 102.5     |
|               |         | 0.45 µm, PP           | 1:4     | 10.689 | 12837.9   | 4.238         | 105.3     |
|               |         | 0.45 µm, PP           | 1:4     | 10.705 | 12499.7   | 4.126         | 102.5     |
|               |         | 0.45 µm, PP           | 1:4     | 10.800 | 12994.1   | 4.290         | 105.5     |
| 0.45 µm, PTFE | 1:4     | 10.670                | 12835.1 | 4.237  | 105.3     |               |           |

|         |         |                      |      |        |         |         |       |
|---------|---------|----------------------|------|--------|---------|---------|-------|
|         | FOSP    | 0.45 µm, PTFE        | 1:4  | 10.705 | 12510.7 | 4.129   | 102.6 |
|         |         | 0.45 µm, PTFE        | 1:4  | 10.871 | 12635.0 | 4.171   | 102.5 |
|         |         | -                    | 1:4  | 10.689 | 11722.5 | 3.868   | 95.4  |
|         |         | -                    | 1:4  | 10.702 | 12224.8 | 4.034   | 99.5  |
|         |         | -                    | 1:4  | 10.864 | 12154.1 | 4.011   | 98.3  |
|         |         | 0.2 µm, NYL          | 1:4  | 10.710 | 13191.8 | 4.356   | 107.4 |
|         |         | 0.2 µm, NYL          | 1:4  | 10.705 | 12621.9 | 4.166   | 102.7 |
|         |         | 0.2 µm, NYL          | 1:4  | 10.698 | 13112.0 | 4.329   | 106.1 |
|         |         | 0.2 µm, PES          | 1:4  | 10.798 | 12757.0 | 4.211   | 103.8 |
|         |         | 0.2 µm, PES          | 1:4  | 10.758 | 12161.3 | 4.013   | 98.9  |
|         |         | 0.2 µm, PES          | 1:4  | 10.764 | 12188.9 | 4.022   | 98.6  |
|         |         | 0.45 µm, PP          | 1:4  | 10.773 | 12767.9 | 4.215   | 103.9 |
|         |         | 0.45 µm, PP          | 1:4  | 10.818 | 11827.7 | 3.903   | 96.2  |
|         |         | 0.45 µm, PP          | 1:4  | 10.804 | 12241.1 | 4.040   | 99.0  |
|         |         | 0.45 µm, PTFE        | 1:4  | 10.827 | 12068.3 | 3.982   | 98.2  |
|         |         | 0.45 µm, PTFE        | 1:4  | 10.837 | 12601.6 | 4.160   | 102.5 |
|         |         | 0.45 µm, PTFE        | 1:4  | 10.790 | 12055.7 | 3.978   | 97.5  |
| 25mg/mL | Control | -                    | 1:25 | 10.798 | 11944.3 | 24.633  | 97.0  |
|         |         | -                    | 1:25 | 10.758 | 14379.5 | 29.687  | 116.9 |
|         |         | -                    | 1:25 | 10.862 | 11665.3 | 24.0537 | 95.7  |
|         |         | 0.2 µm, NYL          | 1:25 | 10.773 | 11466.9 | 23.642  | 93.1  |
|         |         | 0.2 µm, NYL          | 1:25 | 10.818 | 12677.4 | 26.154  | 103.0 |
|         |         | 0.2 µm, NYL          | 1:25 | 10.764 | 12296.3 | 25.3634 | 100.9 |
|         |         | 0.2 µm, PES          | 1:25 | 10.827 | 12401.8 | 25.582  | 100.7 |
|         |         | 0.2 µm, PES          | 1:25 | 10.837 | 12760.3 | 26.326  | 103.7 |
|         |         | 0.2 µm, PES          | 1:25 | 10.825 | 11902.7 | 24.5465 | 97.7  |
|         |         | 0.45 µm, PP          | 1:25 | 10.845 | 12438.3 | 25.658  | 101.0 |
|         |         | 0.45 µm, PP          | 1:25 | 10.850 | 12348.4 | 25.471  | 100.3 |
|         |         | 0.45 µm, PP          | 1:25 | 10.790 | 12080.0 | 24.914  | 99.2  |
|         |         | 0.45 µm, PTFE        | 1:25 | 10.863 | 12308.1 | 25.388  | 100.0 |
|         |         | 0.45 µm, PTFE        | 1:25 | 10.878 | 12353.0 | 25.481  | 100.3 |
|         |         | 0.45 µm, PTFE        | 1:25 | 10.809 | 12022.2 | 24.794  | 98.7  |
|         | Water   | -                    | 1:25 | 10.869 | 14454.7 | 29.843  | 117.9 |
|         |         | -                    | 1:25 | 10.883 | 12820.3 | 26.451  | 104.5 |
|         |         | -                    | 1:25 | 10.802 | 12154.8 | 25.0696 | 98.4  |
|         |         | 0.2 µm, NYL          | 1:25 | 10.875 | 12246.6 | 25.260  | 99.8  |
|         |         | 0.2 µm, NYL          | 1:25 | 10.880 | 12880.1 | 26.575  | 105.0 |
|         |         | 0.2 µm, NYL          | 1:25 | 10.795 | 12189.9 | 25.1425 | 98.7  |
|         |         | 0.2 µm, PES          | 1:25 | 10.890 | 13006.2 | 26.837  | 106.0 |
|         |         | 0.2 µm, PES          | 1:25 | 10.888 | 12349.3 | 25.473  | 100.6 |
|         |         | 0.2 µm, PES          | 1:25 | 10.804 | 12319.8 | 25.412  | 99.8  |
|         |         | 0.45 µm, PP          | 1:25 | 10.874 | 12151.9 | 25.064  | 99.0  |
|         |         | 0.45 µm, PP          | 1:25 | 10.895 | 12717.0 | 26.237  | 103.6 |
|         |         | 0.45 µm, PP          | 1:25 | 10.871 | 12339.4 | 25.453  | 99.9  |
|         |         | 0.45 µm, PTFE        | 1:25 | 10.908 | 12158.5 | 25.077  | 99.1  |
|         |         | 0.45 µm, PTFE        | 1:25 | 10.915 | 12187.9 | 25.138  | 99.3  |
|         |         | 0.45 µm, PTFE        | 1:25 | 10.757 | 12296.6 | 25.3641 | 99.6  |
|         |         | After centrifugation | 1:25 | 10.913 | 13200.2 | 27.2394 | 107.6 |

|  |                      |                      |      |        |         |         |        |
|--|----------------------|----------------------|------|--------|---------|---------|--------|
|  |                      | After centrifugation | 1:25 | 10.920 | 12167.4 | 25.0957 | 98.5   |
|  |                      | After centrifugation | 1:25 | 10.925 | 12203.2 | 25.170  | 99.4   |
|  | CMC                  | -                    | 1:25 | 10.939 | 14364.2 | 29.655  | 117.0  |
|  |                      | -                    | 1:25 | 10.954 | 14512.6 | 29.963  | 118.2  |
|  |                      | -                    | 1:25 | 10.777 | 13132.4 | 27.099  | 106.6  |
|  |                      | 0.2 µm, NYL          | 1:25 | 10.922 | 12877.9 | 26.570  | 104.9  |
|  |                      | 0.2 µm, NYL          | 1:25 | 10.928 | 12680.5 | 26.161  | 103.2  |
|  |                      | 0.2 µm, NYL          | 1:25 | 10.564 | 12700.6 | 26.2024 | 103.1  |
|  |                      | 0.2 µm, PES          | 1:25 | 10.692 | 12146.2 | 25.052  | 98.9   |
|  |                      | 0.2 µm, PES          | 1:25 | 10.780 | 12685.8 | 26.172  | 103.3  |
|  |                      | 0.2 µm, PES          | 1:25 | 10.731 | 12212.4 | 25.1892 | 99.1   |
|  |                      | 0.45 µm, PP          | 1:25 | 10.815 | 12454.9 | 25.693  | 101.4  |
|  |                      | 0.45 µm, PP          | 1:25 | 10.821 | 13071.3 | 26.972  | 106.4  |
|  |                      | 0.45 µm, PP          | 1:25 | 10.702 | 13389.7 | 27.633  | 108.7  |
|  |                      | 0.45 µm, PTFE        | 1:25 | 10.837 | 13098.7 | 27.029  | 106.7  |
|  |                      | 0.45 µm, PTFE        | 1:25 | 10.828 | 12552.1 | 25.894  | 102.2  |
|  |                      | 0.45 µm, PTFE        | 1:25 | 10.827 | 12193.1 | 25.149  | 98.9   |
|  |                      | After centrifugation | 1:25 | 10.839 | 12752.0 | 26.309  | 103.8  |
|  |                      | After centrifugation | 1:25 | 10.831 | 12111.9 | 24.981  | 98.3   |
|  |                      | After centrifugation | 1:25 | 10.825 | 12760.9 | 26.328  | 103.9  |
|  |                      | FOSP                 | -    | 1:25   | 10.830  | 12081.8 | 24.918 |
|  | -                    |                      | 1:25 | 10.828 | 13772.0 | 28.426  | 111.6  |
|  | -                    |                      | 1:25 | 10.827 | 12583.3 | 25.959  | 101.8  |
|  | 0.2 µm, NYL          |                      | 1:25 | 10.782 | 12103.0 | 24.962  | 98.0   |
|  | 0.2 µm, NYL          |                      | 1:25 | 10.765 | 12633.2 | 26.063  | 102.3  |
|  | 0.2 µm, NYL          |                      | 1:25 | 10.88  | 13528.9 | 27.922  | 109.5  |
|  | 0.2 µm, PES          |                      | 1:25 | 10.758 | 12291.2 | 25.353  | 99.5   |
|  | 0.2 µm, PES          |                      | 1:25 | 10.796 | 12273.4 | 25.316  | 99.4   |
|  | 0.2 µm, PES          |                      | 1:25 | 10.921 | 11731.9 | 24.192  | 94.9   |
|  | 0.45 µm, PP          |                      | 1:25 | 10.842 | 12383.5 | 25.544  | 100.3  |
|  | 0.45 µm, PP          |                      | 1:25 | 10.856 | 12369.7 | 25.516  | 100.2  |
|  | 0.45 µm, PP          |                      | 1:25 | 10.939 | 11934.3 | 24.612  | 96.5   |
|  | 0.45 µm, PTFE        |                      | 1:25 | 10.876 | 12816.4 | 26.443  | 103.8  |
|  | 0.45 µm, PTFE        |                      | 1:25 | 10.826 | 12883.8 | 26.583  | 104.4  |
|  | 0.45 µm, PTFE        |                      | 1:25 | 10.692 | 12220.0 | 25.205  | 98.8   |
|  | After centrifugation |                      | 1:25 | 10.837 | 13243.8 | 27.330  | 107.3  |
|  | After centrifugation |                      | 1:25 | 10.835 | 11385.9 | 23.474  | 99.5   |
|  | After centrifugation |                      | 1:25 | 10.842 | 12820.0 | 26.450  | 103.8  |

**Table S2** Raw data of analytical analyses of filtered suspension containing hydroxychloroquine

| Conc.   | Vehicle | Filter/centrifugation | Dil. | RT    | Peak area | Conc. (mg/mL) | Assay (%) |
|---------|---------|-----------------------|------|-------|-----------|---------------|-----------|
| 4 mg/mL | Control | -                     | 1:4  | 4.277 | 6819.2    | 4.030         | 100.7     |
|         |         | -                     | 1:4  | 4.278 | 6507.5    | 3.843         | 96.0      |
|         |         | -                     | 1:4  | 4.256 | 7101.2    | 4.199         | 102.2     |
|         |         | 0.2 µm, NYL           | 1:4  | 4.238 | 7014.4    | 4.147         | 103.6     |
|         |         | 0.2 µm, NYL           | 1:4  | 4.221 | 7077.5    | 4.184         | 104.5     |
|         |         | 0.2 µm, NYL           | 1:4  | 4.288 | 6887.0    | 4.070         | 99.1      |
|         |         | 0.2 µm, PES           | 1:4  | 4.212 | 7157.6    | 4.232         | 105.7     |
|         |         | 0.2 µm, PES           | 1:4  | 4.220 | 7177.0    | 4.244         | 106.0     |
|         |         | 0.2 µm, PES           | 1:4  | 4.268 | 6972.2    | 4.121         | 100.4     |
|         |         | 0.45 µm, PP           | 1:4  | 4.211 | 6940.3    | 4.102         | 102.5     |
|         |         | 0.45 µm, PP           | 1:4  | 4.225 | 6901.8    | 4.079         | 101.9     |
|         |         | 0.45 µm, PP           | 1:4  | 4.283 | 6947.6    | 4.107         | 100.0     |
|         |         | 0.45 µm, PTFE         | 1:4  | 4.225 | 7242.6    | 4.283         | 107.0     |
|         |         | 0.45 µm, PTFE         | 1:4  | 4.213 | 7284.2    | 4.308         | 107.6     |
|         |         | 0.45 µm, PTFE         | 1:4  | 4.283 | 7192.5    | 4.253         | 103.6     |
|         | Water   | -                     | 1:4  | 4.241 | 6813.8    | 4.027         | 101.3     |
|         |         | -                     | 1:4  | 4.250 | 7180.1    | 4.246         | 106.8     |
|         |         | -                     | 1:4  | 4.242 | 7136.2    | 4.220         | 106.3     |
|         |         | 0.2 µm, NYL           | 1:4  | 4.236 | 6913.4    | 4.086         | 102.8     |
|         |         | 0.2 µm, NYL           | 1:4  | 4.251 | 6632.4    | 3.918         | 98.6      |
|         |         | 0.2 µm, NYL           | 1:4  | 4.275 | 6908.9    | 4.084         | 102.8     |
|         |         | 0.2 µm, PES           | 1:4  | 4.242 | 6979.0    | 4.125         | 103.8     |
|         |         | 0.2 µm, PES           | 1:4  | 4.257 | 6587.4    | 3.891         | 97.9      |
|         |         | 0.2 µm, PES           | 1:4  | 4.265 | 7027.5    | 4.155         | 104.6     |
|         |         | 0.45 µm, PP           | 1:4  | 4.242 | 6656.6    | 3.933         | 99.0      |
|         |         | 0.45 µm, PP           | 1:4  | 4.257 | 6753.0    | 3.990         | 100.4     |
|         |         | 0.45 µm, PP           | 1:4  | 4.252 | 7020.6    | 4.150         | 104.5     |
|         |         | 0.45 µm, PTFE         | 1:4  | 4.241 | 6719.0    | 3.970         | 99.9      |
|         |         | 0.45 µm, PTFE         | 1:4  | 4.242 | 6664.7    | 3.937         | 99.1      |
|         |         | 0.45 µm, PTFE         | 1:4  | 4.263 | 7009.1    | 4.143         | 104.3     |
|         | CMC     | -                     | 1:4  | 4.258 | 6212.4    | 3.667         | 92.3      |
|         |         | -                     | 1:4  | 4.231 | 7172.2    | 4.241         | 106.8     |
|         |         | -                     | 1:4  | 4.289 | 6886.7    | 4.070         | 102.3     |
|         |         | 0.2 µm, NYL           | 1:4  | 4.240 | 6939.3    | 4.102         | 103.3     |
|         |         | 0.2 µm, NYL           | 1:4  | 4.241 | 6961.9    | 4.115         | 103.6     |
|         |         | 0.2 µm, NYL           | 1:4  | 4.296 | 7108.3    | 4.203         | 105.6     |
|         |         | 0.2 µm, PES           | 1:4  | 4.231 | 7030.9    | 4.157         | 104.7     |
|         |         | 0.2 µm, PES           | 1:4  | 4.230 | 6859.5    | 4.054         | 102.1     |
|         |         | 0.2 µm, PES           | 1:4  | 4.315 | 6914.0    | 4.087         | 102.7     |
|         |         | 0.45 µm, PP           | 1:4  | 4.236 | 6678.3    | 3.946         | 99.4      |
|         |         | 0.45 µm, PP           | 1:4  | 4.248 | 6675.2    | 3.944         | 99.3      |
|         |         | 0.45 µm, PP           | 1:4  | 4.287 | 7096.0    | 4.195         | 105.4     |

|               |             |               |         |        |        |         |        |        |       |
|---------------|-------------|---------------|---------|--------|--------|---------|--------|--------|-------|
|               | FOSP        | 0.45 µm, PTFE | 1:4     | 4.230  | 6665.1 | 3.938   | 99.2   |        |       |
|               |             | 0.45 µm, PTFE | 1:4     | 4.236  | 6790.4 | 4.013   | 101.1  |        |       |
|               |             | 0.45 µm, PTFE | 1:4     | 4.349  | 7030.2 | 4.156   | 104.4  |        |       |
|               |             | -             | 1:4     | 4.248  | 6802.9 | 4.020   | 100.4  |        |       |
|               |             | -             | 1:4     | 4.230  | 6774.3 | 4.003   | 100.0  |        |       |
|               |             | -             | 1:4     | 4.260  | 6696.3 | 3.956   | 99.4   |        |       |
|               |             | 0.2 µm, NYL   | 1:4     | 4.257  | 6526.3 | 3.855   | 96.3   |        |       |
|               |             | 0.2 µm, NYL   | 1:4     | 4.250  | 6504.9 | 3.842   | 95.9   |        |       |
|               |             | 0.2 µm, NYL   | 1:4     | 4.282  | 6816.2 | 4.028   | 101.2  |        |       |
|               |             | 0.2 µm, PES   | 1:4     | 4.276  | 6839.5 | 4.042   | 100.9  |        |       |
|               |             | 0.2 µm, PES   | 1:4     | 4.236  | 6902.9 | 4.080   | 101.9  |        |       |
|               |             | 0.2 µm, PES   | 1:4     | 4.265  | 7057.3 | 4.172   | 104.8  |        |       |
|               |             | 0.45 µm, PP   | 1:4     | 4.254  | 6484.6 | 3.830   | 95.6   |        |       |
|               |             | 0.45 µm, PP   | 1:4     | 4.232  | 6957.2 | 4.112   | 102.7  |        |       |
|               |             | 0.45 µm, PP   | 1:4     | 4.280  | 6746.3 | 3.986   | 100.1  |        |       |
|               |             | 0.45 µm, PTFE | 1:4     | 4.250  | 6816.3 | 4.028   | 100.6  |        |       |
|               |             | 0.45 µm, PTFE | 1:4     | 4.229  | 6731.2 | 3.977   | 99.3   |        |       |
|               |             | 0.45 µm, PTFE | 1:4     | 4.263  | 6074.6 | 3.584   | 90.0   |        |       |
|               |             | 25mg/mL       | Control | -      | 1:25   | 4.173   | 7807.7 | 24.323 | 102.7 |
|               |             |               |         | -      | 1:25   | 4.190   | 7585.5 | 23.623 | 99.7  |
| -             | 1:25        |               |         | 4.258  | 7471.1 | 23.263  | 90.6   |        |       |
| 0.2 µm, NYL   | 1:25        |               |         | 4.185  | 7637.6 | 23.787  | 100.4  |        |       |
| 0.2 µm, NYL   | 1:25        |               |         | 4.190  | 7496.2 | 23.342  | 98.5   |        |       |
| 0.2 µm, NYL   | 1:25        |               |         | 4.280  | 7560.6 | 23.545  | 91.7   |        |       |
| 0.2 µm, PES   | 1:25        |               |         | 4.193  | 7358.8 | 22.909  | 96.7   |        |       |
| 0.2 µm, PES   | 1:25        |               |         | 4.187  | 7608.2 | 23.695  | 100.0  |        |       |
| 0.2 µm, PES   | 1:25        |               |         | 4.291  | 7352.2 | 22.888  | 89.2   |        |       |
| 0.45 µm, PP   | 1:25        |               |         | 4.171  | 7636.5 | 23.784  | 100.4  |        |       |
| 0.45 µm, PP   | 1:25        |               |         | 4.173  | 7614.3 | 23.714  | 100.1  |        |       |
| 0.45 µm, PP   | 1:25        |               |         | 4.256  | 7485.7 | 23.309  | 90.8   |        |       |
| 0.45 µm, PTFE | 1:25        |               |         | 4.173  | 7556.5 | 23.532  | 99.3   |        |       |
| 0.45 µm, PTFE | 1:25        |               |         | 4.147  | 7762.9 | 24.182  | 102.1  |        |       |
| 0.45 µm, PTFE | 1:25        |               |         | 4.332  | 7196.1 | 22.397  | 87.3   |        |       |
| Water         | -           |               |         | 1:25   | 4.259  | 8313.3  | 25.916 | 103.5  |       |
|               | -           |               |         | 1:25   | 4.249  | 8376.6  | 26.115 | 104.3  |       |
|               | -           |               |         | 1:25   | 4.172  | 10225.9 | 31.940 | 128.7  |       |
|               | 0.2 µm, NYL |               |         | 1:25   | 4.273  | 7950.2  | 24.772 | 99.0   |       |
|               | 0.2 µm, NYL |               | 1:25    | 4.262  | 8271.7 | 25.785  | 103.0  |        |       |
|               | 0.2 µm, NYL |               | 1:25    | 4.259  | 7356.8 | 22.903  | 92.3   |        |       |
|               | 0.2 µm, PES |               | 1:25    | 4.268  | 7811.8 | 24.336  | 97.2   |        |       |
|               | 0.2 µm, PES |               | 1:25    | 4.271  | 8228.3 | 25.648  | 102.5  |        |       |
|               | 0.2 µm, PES |               | 1:25    | 4.210  | 7842.5 | 24.433  | 98.4   |        |       |
|               | 0.45 µm, PP |               | 1:25    | 4.268  | 8105.5 | 25.261  | 100.9  |        |       |
| 0.45 µm, PP   | 1:25        |               | 4.261   | 8375.4 | 26.111 | 104.3   |        |        |       |
| 0.45 µm, PP   | 1:25        |               | 4.261   | 7212.6 | 22.449 | 90.5    |        |        |       |
| 0.45 µm, PTFE | 1:25        |               | 4.267   | 8136.3 | 25.358 | 101.3   |        |        |       |

|                      |                      |      |       |        |        |        |      |
|----------------------|----------------------|------|-------|--------|--------|--------|------|
|                      | 0.45 µm, PTFE        | 1:25 | 4.259 | 7827.5 | 24.386 | 97.4   |      |
|                      | 0.45 µm, PTFE        | 1:25 | 4.253 | 6970.2 | 21.685 | 87.4   |      |
|                      | After centrifugation | 1:25 | 4.250 | 8205.6 | 25.577 | 102.2  |      |
|                      | After centrifugation | 1:25 | 4.258 | 8540.4 | 26.631 | 106.4  |      |
|                      | After centrifugation | 1:25 | 4.342 | 7962.9 | 24.812 | 100.0  |      |
| CMC                  | -                    | 1:25 | 4.264 | 8087.4 | 25.204 | 101.1  |      |
|                      | -                    | 1:25 | 4.237 | 9119.2 | 28.454 | 114.2  |      |
|                      | -                    | 1:25 | 4.270 | 6901.8 | 21.470 | 86.3   |      |
|                      | 0.2 µm, NYL          | 1:25 | 4.235 | 8471.0 | 26.413 | 106.0  |      |
|                      | 0.2 µm, NYL          | 1:25 | 4.257 | 8607.5 | 26.843 | 107.7  |      |
|                      | 0.2 µm, NYL          | 1:25 | 4.297 | 7248.4 | 22.562 | 90.7   |      |
|                      | 0.2 µm, PES          | 1:25 | 4.249 | 8383.0 | 26.135 | 104.9  |      |
|                      | 0.2 µm, PES          | 1:25 | 4.237 | 8433.9 | 26.296 | 105.5  |      |
|                      | 0.2 µm, PES          | 1:25 | 4.325 | 7707.1 | 24.006 | 96.5   |      |
|                      | 0.45 µm, PP          | 1:25 | 4.242 | 8304.9 | 25.889 | 103.9  |      |
|                      | 0.45 µm, PP          | 1:25 | 4.246 | 8292.1 | 25.849 | 103.7  |      |
|                      | 0.45 µm, PP          | 1:25 | 4.282 | 7171.5 | 22.319 | 89.7   |      |
|                      | 0.45 µm, PTFE        | 1:25 | 4.244 | 8239.8 | 25.684 | 103.0  |      |
|                      | 0.45 µm, PTFE        | 1:25 | 4.262 | 7919.3 | 24.675 | 99.0   |      |
|                      | 0.45 µm, PTFE        | 1:25 | 4.34  | 7405.5 | 23.056 | 92.7   |      |
|                      | After centrifugation | 1:25 | 4.241 | 8324.9 | 25.952 | 104.1  |      |
|                      | After centrifugation | 1:25 | 4.292 | 7482.5 | 23.299 | 93.7   |      |
|                      | After centrifugation | 1:25 | 4.249 | 7845.7 | 24.443 | 98.1   |      |
|                      | FOSP                 | -    | 1:25  | 4.257  | 7909.0 | 24.642 | 98.3 |
|                      |                      | -    | 1:25  | 4.241  | 7996.9 | 24.919 | 99.4 |
| -                    |                      | 1:25 | 4.245 | 7323.0 | 22.797 | 91.6   |      |
| 0.2 µm, NYL          |                      | 1:25 | 4.266 | 7885.1 | 24.567 | 98.0   |      |
| 0.2 µm, NYL          |                      | 1:25 | 4.269 | 7914.1 | 24.658 | 98.3   |      |
| 0.2 µm, NYL          |                      | 1:25 | 4.249 | 6939.3 | 21.588 | 86.8   |      |
| 0.2 µm, PES          |                      | 1:25 | 4.252 | 8009.8 | 24.960 | 99.5   |      |
| 0.2 µm, PES          |                      | 1:25 | 4.270 | 7991.6 | 24.903 | 99.3   |      |
| 0.2 µm, PES          |                      | 1:25 | 4.272 | 7159.6 | 22.282 | 89.6   |      |
| 0.45 µm, PP          |                      | 1:25 | 4.247 | 7879.4 | 24.549 | 97.9   |      |
| 0.45 µm, PP          |                      | 1:25 | 4.250 | 7800.5 | 24.301 | 96.9   |      |
| 0.45 µm, PP          |                      | 1:25 | 4.273 | 7626.8 | 23.753 | 95.5   |      |
| 0.45 µm, PTFE        |                      | 1:25 | 4.240 | 7792.7 | 24.276 | 96.8   |      |
| 0.45 µm, PTFE        |                      | 1:25 | 4.258 | 8009.8 | 24.960 | 99.5   |      |
| 0.45 µm, PTFE        |                      | 1:25 | 4.212 | 9045.9 | 28.223 | 113.4  |      |
| After centrifugation |                      | 1:25 | 4.245 | 7897.4 | 24.606 | 98.1   |      |
| After centrifugation |                      | 1:25 | 4.234 | 8265.7 | 25.766 | 102.7  |      |
| After centrifugation |                      | 1:25 | 4.303 | 7610.6 | 23.703 | 95.3   |      |
